# Supplementary material for: The Validity of Online Patient Ratings of Physicians: Analysis of Physician Peer Reviews and Patient Ratings
Source: PubMed Central journal article supplement (PMC5913572; doi:10.2196/ijmr.9350), 2018-04-09
Supplement: ijmr_v7i1e8_app1.pdf [file ijmr_v7i1e8_app1.pdf]

Multimedia Appendix 1. Overall Mean Ratings by Specialization for Physicians listed and not listed in

|                            | Overall                           |                            |                  | Listed in Castle Connolly |                            |
|----------------------------|-----------------------------------|----------------------------|------------------|---------------------------|----------------------------|
|                            | Number of Physicians <sup>a</sup> | Mean Reviews per Physician | Rating Mean (SD) | Number of Physicians      | Mean Reviews per Physician |
| Overall                    | 24,579                            | 9.1                        | 3.85 (0.90)      | 622                       | 8.57                       |
| Site                       |                                   |                            |                  |                           |                            |
| Healthgrades.com           | 11,954                            | 9.44                       | 3.89 (0.91)      | 111                       | 9.62                       |
| RateMDs.com                | 9,672                             | 7.38                       | 3.74 (0.91)      | 464                       | 7.74                       |
| Vitals.com                 | 2,953                             | 13.38                      | 4.09 (0.76)      | 47                        | 14.28                      |
| Type of Specialty          |                                   |                            |                  |                           |                            |
| Allergists / Immunologists | 743                               | 7.82                       | 3.91 (0.86)      | 13                        | 6.15                       |
| Cardiologists              | 1,079                             | 6.73                       | 4.21 (0.77)      | 35                        | 5.46                       |
| Dermatologists             | 1,692                             | 10.47                      | 3.76 (0.89)      | 33                        | 11.33                      |
| Endocrinologists           | 1,273                             | 12.17                      | 3.64 (0.87)      | 35                        | 9.11                       |
| ENT Doctors                | 310                               | 7.42                       | 3.75 (0.89)      | 22                        | 6.68                       |
| Family Medicine            | 3,003                             | 7.55                       | 3.73 (0.92)      | 61                        | 7.26                       |
| Gastroenterologists        | 1,577                             | 9.47                       | 3.79 (0.88)      | 52                        | 8.21                       |
| General Surgeons           | 514                               | 9.35                       | 4.03 (0.83)      | 30                        | 8.97                       |
| Gynecologists              | 1,164                             | 10.21                      | 3.68 (0.85)      | 37                        | 8.16                       |
| Hematology and Oncology    | 323                               | 7.61                       | 3.94 (0.87)      | 23                        | 6.7                        |
| Internal Medicine          | 1,680                             | 8.62                       | 3.92 (0.93)      | 10                        | 8.4                        |
| Neurologists               | 795                               | 9.28                       | 3.85 (0.82)      | 56                        | 11.14                      |
| Obstetrics and Gynecology  | 1,751                             | 11.34                      | 3.89 (0.88)      | 17                        | 9.65                       |
| Ophthalmology              | 1,238                             | 9.13                       | 4.01 (0.84)      | 15                        | 12.67                      |
| Orthopedic Surgeons        | 1,796                             | 12.65                      | 3.89 (0.86)      | 68                        | 8.49                       |
| Pediatricians              | 886                               | 6.36                       | 3.91 (0.92)      | 26                        | 7.31                       |
| Pulmonologists             | 124                               | 6.65                       | 3.71 (0.90)      | 9                         | 4.22                       |
| Rheumatologists            | 153                               | 9.69                       | 3.77 (0.82)      | 15                        | 11.73                      |
| Urology                    | 286                               | 8.66                       | 3.77 (0.83)      | 21                        | 9.95                       |

Notes:

- a. Only physicians with 3 or more ratings were included and only specialties with more than 5 physicians
- b. Based on Mann Whitney test

1 Castle Connolly Medical.

| Not Listed in Castle Connolly |                      |                            |                  |                                                                 |                      |
|-------------------------------|----------------------|----------------------------|------------------|-----------------------------------------------------------------|----------------------|
| Rating Mean (SD)              | Number of Physicians | Mean Reviews per Physician | Rating Mean (SD) | Difference in Mean Rating For Listed versus Not Listed (95% CI) | p-value <sup>b</sup> |
| 3.94 (0.80)                   | 23,957               | 9.12                       | 3.85 (0.90)      | 0.09 (0.15,0.3)                                                 | 0.0793               |
| 4.06 (0.72)                   | 11,843               | 9.44                       | 3.89 (0.91)      | 0.17 (0.30,0.03)                                                | 0.1043               |
| 3.88 (0.83)                   | 9,208                | 7.36                       | 3.73 (0.91)      | 0.15 (0.23,0.07)                                                | 0.0014               |
| 4.27 (0.61)                   | 2,906                | 13.37                      | 4.08 (0.76)      | 0.18 (0.40,-0.03)                                               | 0.1232               |
| 4.49 (0.39)                   | 730                  | 7.85                       | 3.90 (0.86)      | 0.60 (0.84,0.36)                                                | 0.0146               |
| 4.02 (0.68)                   | 1,044                | 6.77                       | 4.21 (0.78)      | -0.19 (0.07,-0.45)                                              | 0.0623               |
| 3.67 (0.79)                   | 1,659                | 10.45                      | 3.76 (0.89)      | -0.09 (0.21,-0.40)                                              | 0.3701               |
| 3.70 (0.84)                   | 1,238                | 12.26                      | 3.64 (0.87)      | 0.06 (0.35,-0.23)                                               | 0.7338               |
| 3.79 (0.93)                   | 288                  | 7.48                       | 3.75 (0.89)      | 0.04 (0.43,-0.35)                                               | 0.785                |
| 4.38 (0.51)                   | 2,942                | 7.55                       | 3.71 (0.92)      | 0.67 (0.80,0.53)                                                | <.0001               |
| 3.96 (0.80)                   | 1,525                | 9.51                       | 3.79 (0.88)      | 0.17 (0.42,-0.07)                                               | 0.1854               |
| 4.05 (0.63)                   | 484                  | 9.37                       | 4.03 (0.84)      | 0.03 (0.33,-0.28)                                               | 0.6327               |
| 3.53 (0.88)                   | 1,127                | 10.28                      | 3.69 (0.85)      | -0.15 (0.13,-0.43)                                              | 0.2905               |
| 4.02 (1.06)                   | 300                  | 7.68                       | 3.94 (0.86)      | 0.08 (0.45,-0.29)                                               | 0.3366               |
| 4.42 (0.30)                   | 1,670                | 8.62                       | 3.92 (0.94)      | 0.50 (0.72,0.28)                                                | 0.0525               |
| 3.94 (0.69)                   | 739                  | 9.14                       | 3.84 (0.83)      | 0.10 (0.29,-0.09)                                               | 0.5561               |
| 3.85 (0.87)                   | 1,734                | 11.36                      | 3.89 (0.88)      | -0.05 (0.38,0.47)                                               | 0.8403               |
| 4.07 (0.44)                   | 1,223                | 9.09                       | 4.01 (0.84)      | 0.06 (0.31,-0.19)                                               | 0.7812               |
| 3.81 (0.80)                   | 1,728                | 12.81                      | 3.89 (0.87)      | -0.08 (0.13,-0.29)                                              | 0.2656               |
| 4.58 (0.64)                   | 860                  | 6.33                       | 3.89 (0.92)      | 0.70 (0.96,0.43)                                                | <.0001               |
| 3.75 (1.01)                   | 115                  | 6.84                       | 3.71 (0.90)      | 0.04(0.66,-0.58)                                                | 0.9385               |
| 3.55 (0.48)                   | 138                  | 9.47                       | 3.79 (0.85)      | -0.24 (0.05,-0.54)                                              | 0.1                  |
| 3.87 (0.73)                   | 265                  | 8.56                       | 3.76 (0.84)      | 0.11 (0.48,-0.26)                                               | 0.6072               |

icians were included
